# Supplementary material for: ASO-mediated knockdown or kinase inhibition of G2019S-Lrrk2 modulates lysosomal tubule-associated antigen presentation in macrophages
Source: PubMed Central journal article supplement — Mol Ther Nucleic Acids. 2023 Oct 20;34:102064. doi: 10.1016/j.omtn.2023.102064 (PMC10661462; doi:10.1016/j.omtn.2023.102064), 2023-10-20
Supplement: mmc1.pdf [file mmc1.pdf]

OMTN, Volume 34

## Supplemental information

### **ASO-mediated knockdown or kinase inhibition of *G2019S*-Lrrk2 modulates lysosomal tubule- associated antigen presentation in macrophages**

**Rebecca L. Wallings, Julian R. Mark, Hannah A. Staley, Drew A. Gillett, Noelle Neighbarger, Holly Kordasiewicz, Warren D. Hirst, and Malú Gámez Tansey**

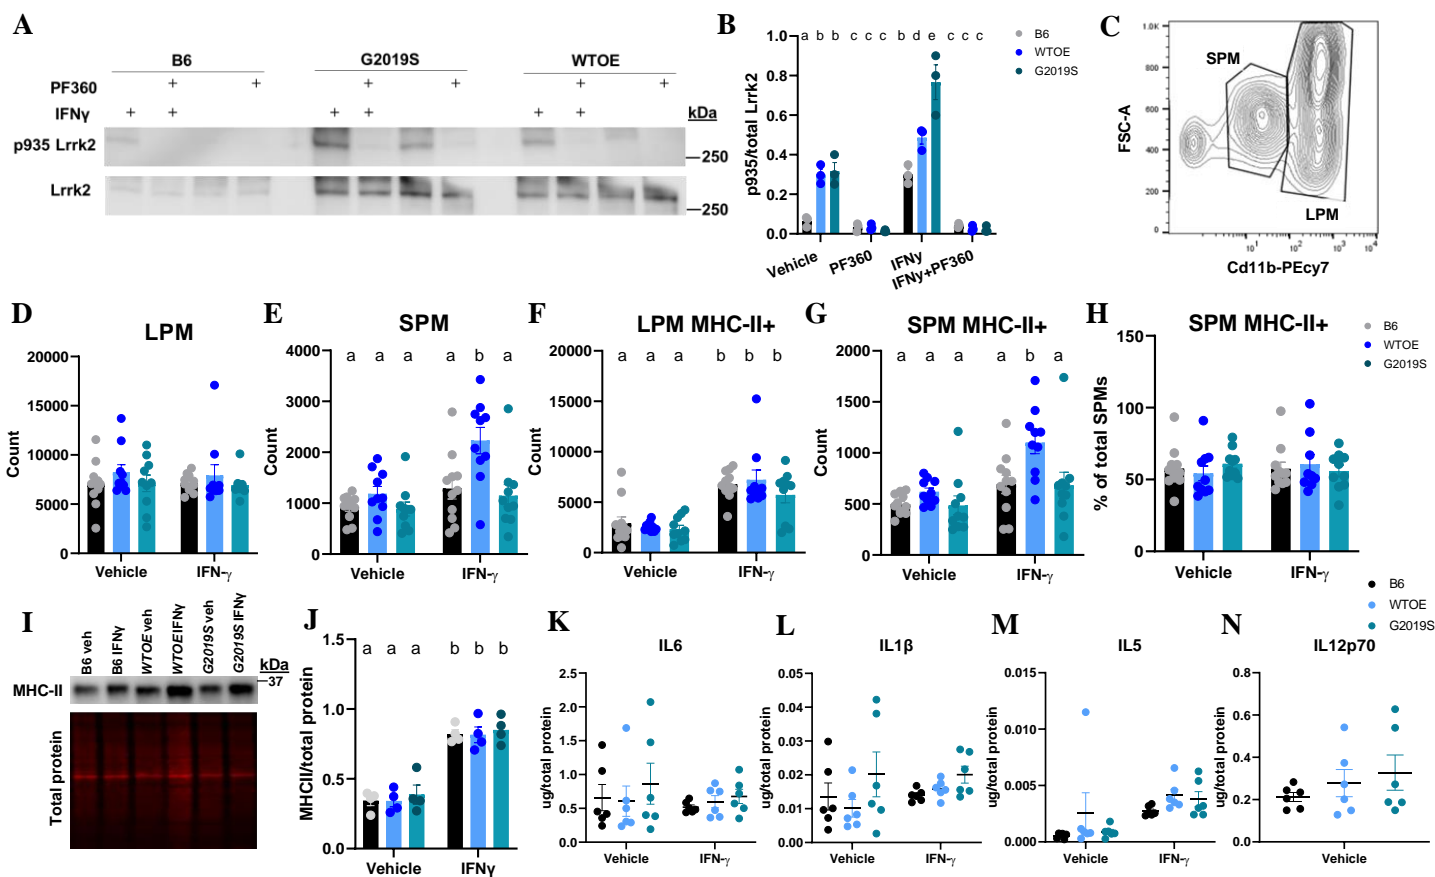

**Figure S1. Altered antigen presentation and lysosomal function in G2019S BAC transgenic pMacs:** pMacs from 10-12-week-old male B6, WTOE or *G2019S* mice were stimulated with 100U IFN $\gamma$  +/- 100nM PF360 for 18-hours. **(A, B)** Total Lrrk2 and phosphorylated LRRK2 at S935 were quantified via western blot. Representative western blots shown. **(C)** Cd11b MFI was used to differentiate LPMs from SPMs via flow-cytometry. **(D, E)** LPM and SPM count was quantified. **(F, G)** MHC-II+ LPM and SPM counts were quantified. **(H)** SPM MHC-II+ count was expressed as a % of total SPMs and quantified. **(I, J)** MHC-II levels were quantified in whole cell lysates. **(K, L, M, N)** Levels of the cytokines IL6, IL1 $\beta$ , IL5, and IL12p70 in media were assessed, normalized to total protein levels and quantified. Bars represent mean +/- SEM (n = 8-10). Two-way ANOVA, Bonferroni post-hoc, groups sharing the same letters are not significantly different ( $p > 0.05$ ) whilst groups displaying different letters are significantly different ( $p < 0.05$ ).

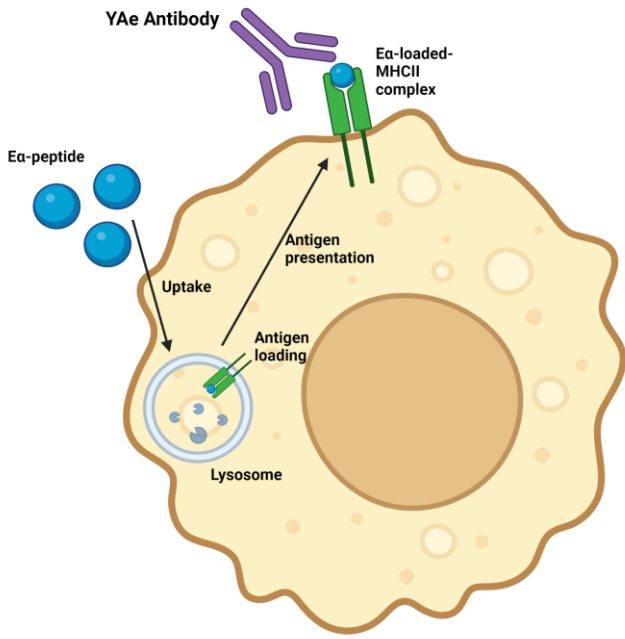

**Figure S2. The Ea: YAe model.**

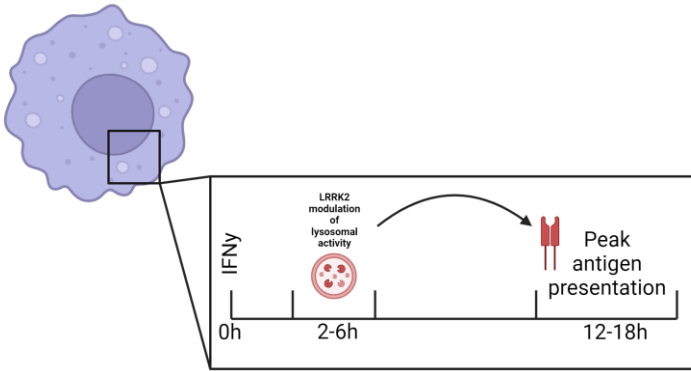

**Figure S3. Schematic of hypothesized *Lrrk2* mediated-regulation of antigen presentation via lysosomal activity early in inflammatory response**

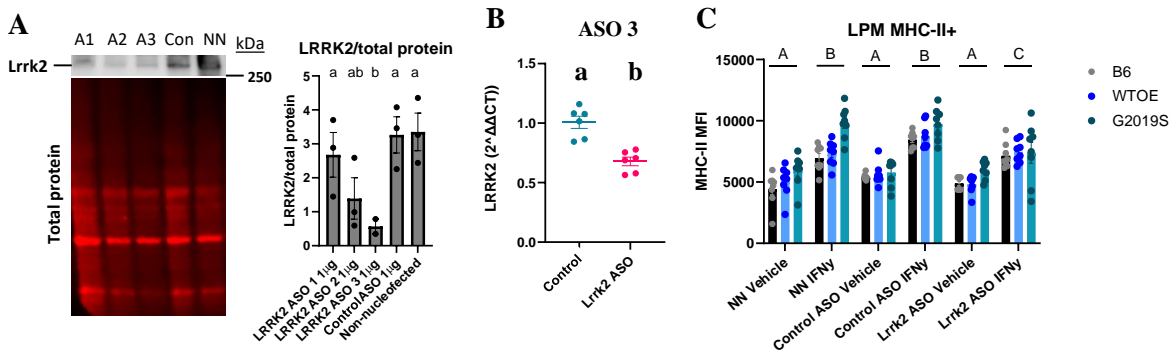

**Figure S4. Optimization of *Lrrk2*-targeting ASOs:** pMacs from 10-12-week-old male B6 were nucleofected with 1 $\mu$ G of 1 of 3 *Lrrk2*-targeting ASOs or a control ASO. **(A)** Total LRRK2 levels were normalized to total protein levels and quantified. Representative western blots shown. Bars represent mean  $\pm$  SEM (N = 3). One-way ANOVA, Bonferroni post-hoc, groups sharing the same letters are not significantly different ( $p > 0.05$ ) whilst groups displaying different letters are significantly different ( $p < 0.05$ ). **(B)** LRRK2 mRNA levels were quantified, normalized to house-keeping gene expression and expressed as  $2^{-\Delta\Delta CT}$  and fold-change from control ASO treated cells. Bars represent mean  $\pm$  SEM (N = 5-6). Student's T-test, groups sharing the same letters are not significantly different ( $p > 0.05$ ) whilst groups displaying different letters are significantly different ( $p < 0.05$ ). **(C)** pMacs from 10-12-week-old male mice were nucleofected with 1  $\mu$ G of *Lrrk2* or control ASO, treated with vehicle or 100U IFN $\gamma$  for 18h and surface MHC-II expression assessed via flow cytometry. Bars represent mean  $\pm$  SEM (n = 8). Two-way ANOVA, Bonferroni post-hoc, main effect of treatments shown, groups sharing the same letters are not significantly different ( $p > 0.05$ ) whilst groups displaying different letters are significantly different ( $p < 0.05$ ).

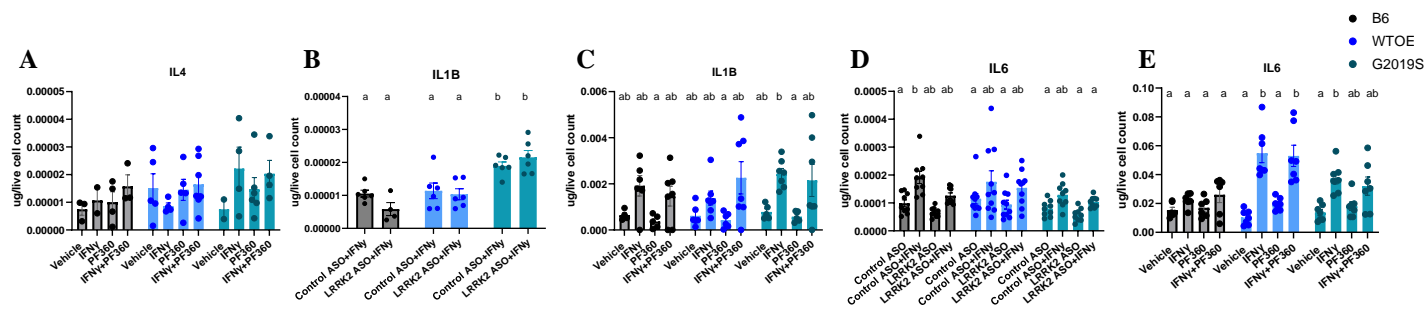

**Figure S5. LRRK2 knock-down via antisense oligonucleotide and kinase inhibition alters cytokine release from pMacs:** pMacs from 10-12-week-old male B6, WTOE or G2019S mice were nucleofected with a *Lrrk2*-targeting ASO or control ASO and stimulated with 100U IFN $\gamma$ , or were plated with 100U IFN $\gamma$  +/- 100nM of Pf360 and media collected after 18-hours. Cytokine levels of IL4 (A), IL1 $\beta$  (B, C), and IL6 (D, E) were quantified and normalized to live cell count. *Lrrk2* protein levels were assessed and normalized to total protein levels and quantified. Bars represent mean +/- SEM (n = 8-10). Two-way ANOVA, Bonferroni post-hoc, groups sharing the same letters are not significantly different (p>0.05) whilst groups displaying different letters are significantly different (p<0.05).

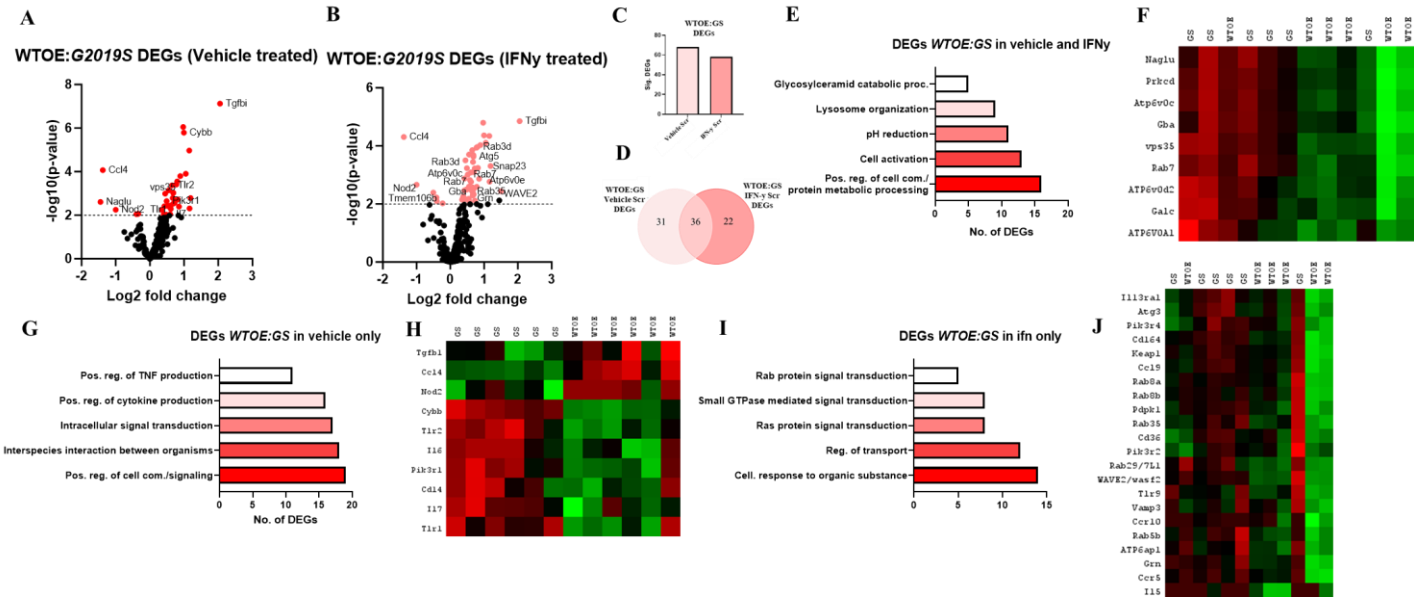

**Figure S6. Nanostring-based transcriptome analysis reveals genotype differences in a treatment specific manner and reveals differential response to IFN- $\gamma$  by G2019S pMacs:** Transcriptomic analysis from vehicle (A) or IFN $\gamma$  (B) treated G2019S and WtOE pMacs Volcano plot shows proteins with fold change > 1.5 and an adjusted p-value  $\leq$  0.05. (C, D) Significant DEGs were counted and compared across treatments. (E) ShinyGO 0.76.3 was used to identify pathways in which significant DEGs were associated with. (F) Heat maps show DEGs in both vehicle and IFN $\gamma$  treatment. (G) ShinyGO 0.76.3 was used to identify pathways in which significant DEGs were associated with. (H) Heat maps show DEGs in only vehicle treatment. (I) ShinyGO 0.76.3 was used to identify pathways in which significant DEGs were associated with. (J) Heat maps show DEGs in only IFN $\gamma$  treatment.

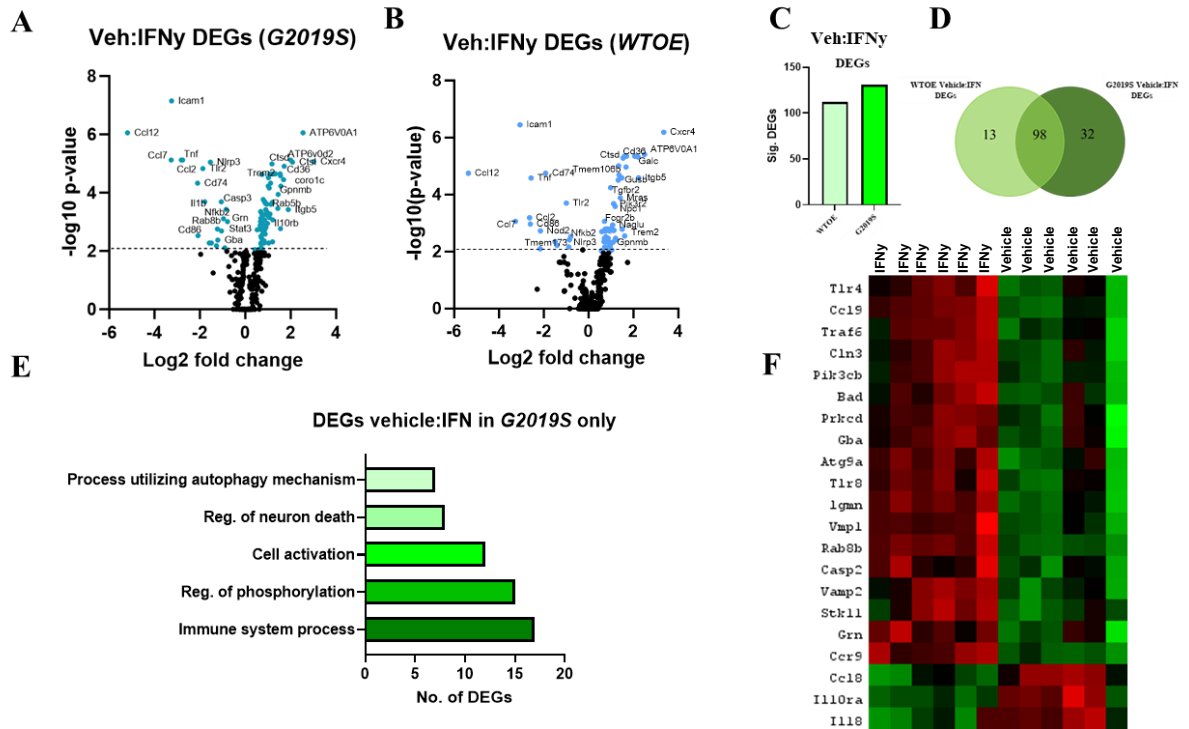

**Figure S7. Nanostring-based transcriptome analysis reveals differential response to IFN- $\gamma$  by *G2019S* pMacs:** Transcriptomic analysis from *WTOE* (A) or *G2019S* (B) vehicle and IFN $\gamma$ -treated pMacs. Volcano plot shows proteins with fold change > 1.5 and an adjusted p-value  $\leq$  0.05. (C, D) Significant DEGs were counted and compared across genotypes. (E) ShinyGO 0.76.3 was used to identify pathways in which significant DEGs were associated with. (F) Heat maps show DEGs seen only in *G2019S* pMacs.



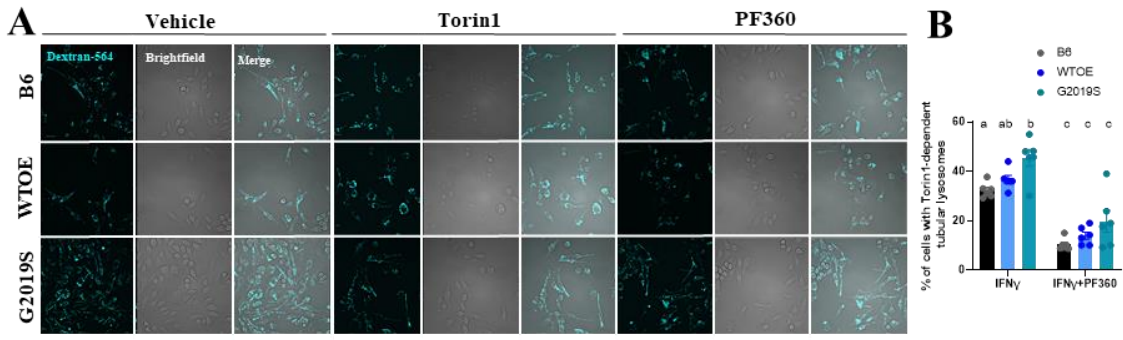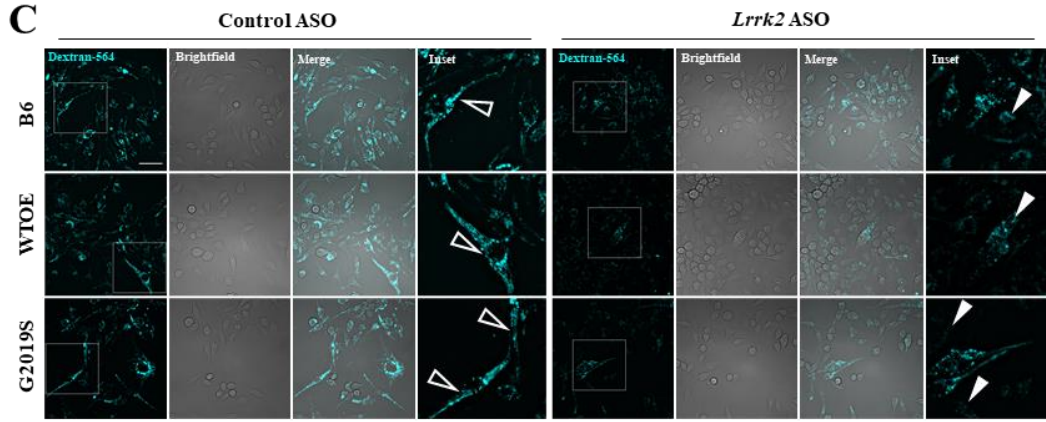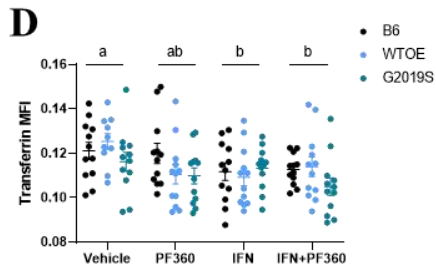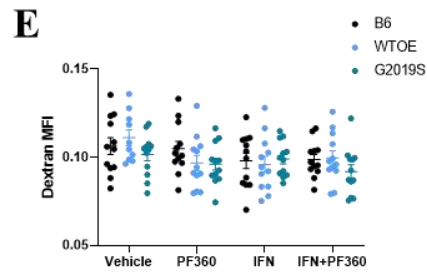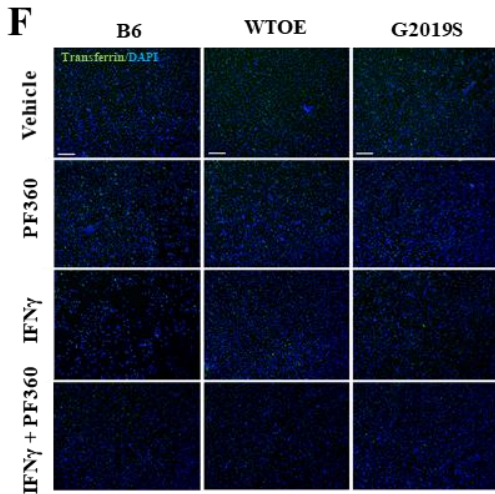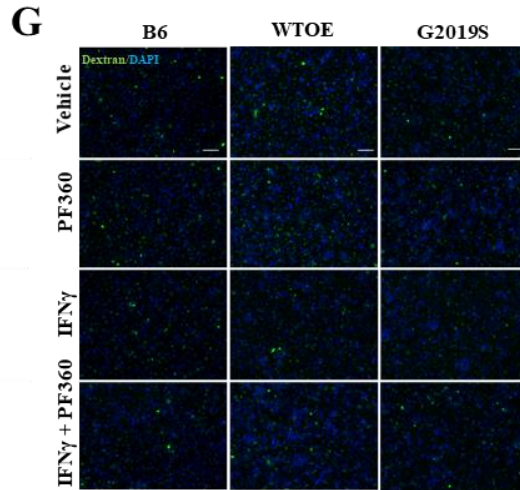

**Figure S8. LRRK2 modulates antigen presentation via lysosomal tubule formation:** (A) pMacs from 10-12-week-old male B6, WTOE or *G2019S* mice treated with 0.5mg/mL Dextran Alexa-Fluor546 for 1-hour, followed by a 2-hour pulse-period to ensure loading into lysosomes, treated with 100U of IFN $\gamma$  +/- 100nM Torin1 or 100nM PF360 for 2-hours to stimulate LTF and imaged live. (B) Percentage of cells with Torin1-dependent tubular lysosomes was quantified. (C) pMacs from 10-12-week-old male B6, WTOE or *G2019S* mice were nucleofected with 1 $\mu$ G of control ASO or *Lrrk2*-targeting ASO, allowed to rest 24 hours, then treated with 0.5mg/mL Dextran Alexa-Fluor546 for 1-hour, followed by a 2-hour pulse-period to ensure loading into lysosomes, treated with 100U of IFN $\gamma$  to stimulate LTF and imaged live. Filled white arrows indicate pMacs with tubular structures, empty arrow heads indicate pMacs with punctate dextran. Scale bars, 10 $\mu$ M (D, E, F, G) pMacs were loaded with 0.5mG/mL of Dextran or transferrin Alexa-Fluor488 for 1 hour, fixed, imaged and uptake quantified. Bars represent mean +/- SEM (n = 4-6). Two-way ANOVA, Bonferroni post-hoc, groups sharing the same letters are not significantly different ( $p > 0.05$ ) whilst groups displaying different letters are significantly different ( $p < 0.05$ ). Scale bars, 40 $\mu$ M.

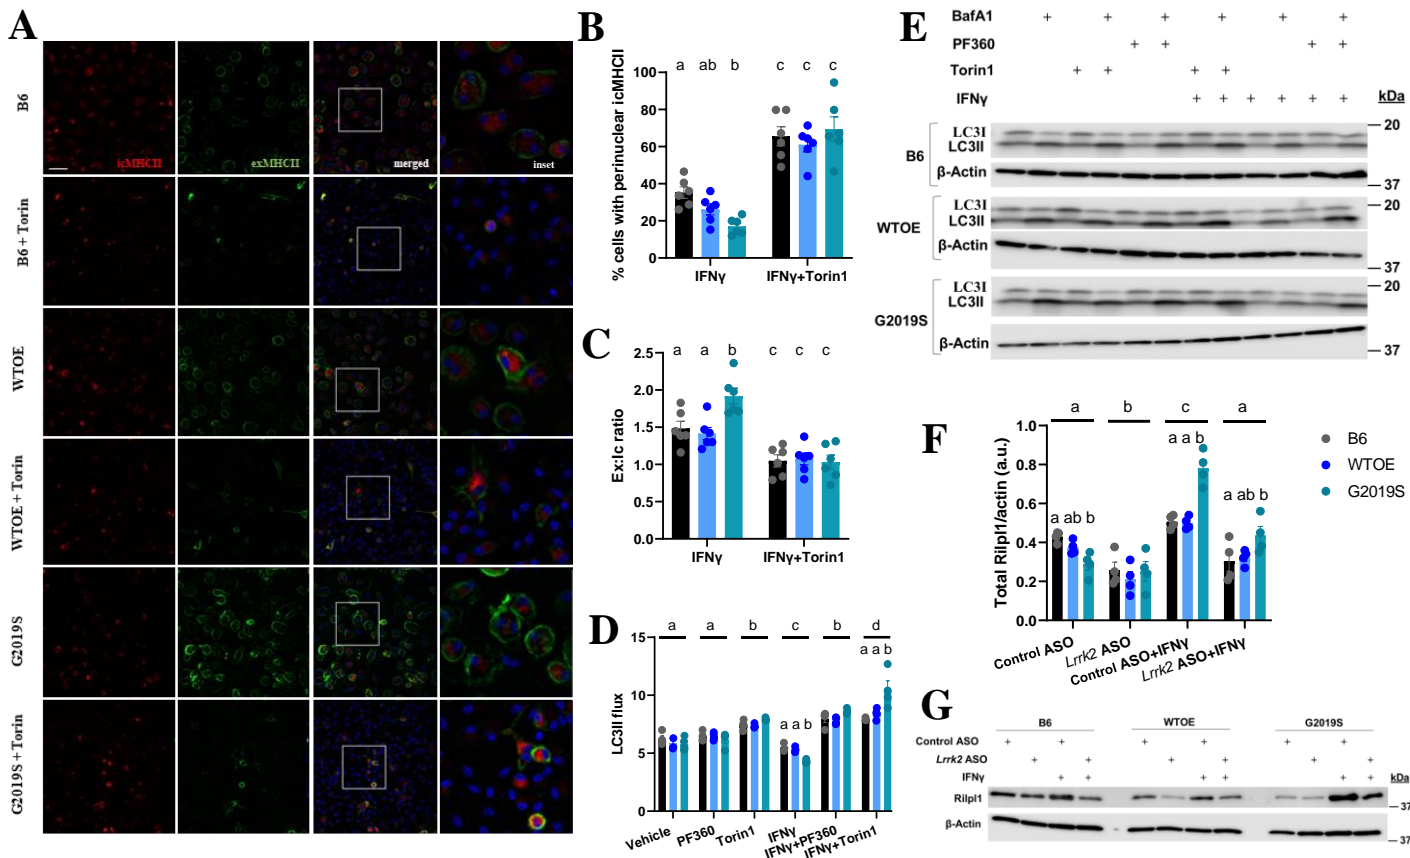

**Figure S9. LRRK2 modulates MHC-II trafficking and autophagic flux :** pMacs from 10-12-week-old male B6, WTOE or *G2019S* mice were treated with 100U of IFN $\gamma$  +/- 100nM Torin1 for 18-hours and stained for intracellular and extracellular MHC-II and Ex:ic ratio quantified and perinuclear clustering % quantified. Scale bars, 30 $\mu$ M. (**A**, **B**, **C**). pMacs were treated with 100U IFN $\gamma$  +/- 100nM Torin1 or PF360 for 18-hours, with 40nM Bafilomycin A1 added to final 2-hours of treatment. Protein lysate quantified for LC3-II levels and LC3 flux quantified (**D**, **E**). Representative western blots shown. pMacs were treated with 100U of IFN $\gamma$  +/- 100nM PF360 and protein lysate assessed for RILPL1 protein levels and normalized to  $\beta$ -actin levels and quantified. Representative western blots shown. Bars represent mean +/- SEM (n = 4-6). Two-way ANOVA, Bonferroni post-hoc, groups sharing the same letters are not significantly different ( $p > 0.05$ ) whilst groups displaying different letters are significantly different ( $p < 0.05$ ).

**Table S1. ASO sequences**

| ASO                | Sequence             |
|--------------------|----------------------|
| <b>Lrrk2 ASO 3</b> | TCCACATTTCTGAATCCCAG |
| <b>Control ASO</b> | CCTATAGGACTCTCCAGGAA |

**Table S2. Flow cytometry monocyte marker antibody panel**

| Target                 | Conjugate | Antibody Cat# | Dilution | Company   |
|------------------------|-----------|---------------|----------|-----------|
| <b>CD11b</b>           | PE-Cy7    | 101216        | 1:100    | Biolegend |
| <b>MHC-II</b>          | APC-Cy7   | 107628        | 1:100    | Biolegend |
| <b>Live/dead stain</b> | Amcyan    | 130113144     | 1:2000   | Fisher    |
| <b>FcR</b>             | -         | NC0093774     | 1:100    | Fisher    |

**Table S3. Antibodies for immunoblotting**

| Target                      | Antibody Cat# | Dilution | Company        |
|-----------------------------|---------------|----------|----------------|
| <b>LRRK2</b>                | ab133474      | 1:1000   | Abcam          |
| <b>LRRK2 pS935</b>          | ab133450      | 1:1000   | Abcam          |
| <b>LC3</b>                  | Z275          | 1:3000   | Cell signaling |
| <b>RILPL1</b>               | ab302492      | 1:1000   | Abcam          |
| <b>mTOR</b>                 | ab134903      | 1:1000   | Abcam          |
| <b>S6k pThr389</b>          | 9205          | 1:1000   | Cell signaling |
| <b>B-actin</b>              | AM4302        | 1:5000   | Thermo         |
| <b>Revert Total Protein</b> | 926-11011     | -        | Licor          |

**Table S4. Nanostring nCounter custom-code set. Custom Panel for profiling 250**

mouse genes within lysosomal, autophagy and inflammatory pathways
